# Supplementary material
Source: Research Square preprint supplement (doi:10.21203/rs.3.rs-9860868/v1)
Supplement: Supplementary file 2 [file 79d89263be8a4ff606feaddc.pdf]

1 **Supplementary Information**

2

3 **Structural and functional dissection of ASCT2 interaction with Syncytin-1 mediating cell-cell fusion**

4

5 Anna M. Borowska, Krystof StafI, Michal Sykora, Jan Rheinberger, Martin Travnicek, Lubomira Pecnova,  
6 Anna Janovska, Jiri Hejnar, Cristina Paulino, Dirk J. Slotboom, Katerina Trejbalova

7

8 Correspondence: DJS (d.j.slotboom@rug.nl) and KT (katerina.trejbalova@img.cas.cz)

9

10

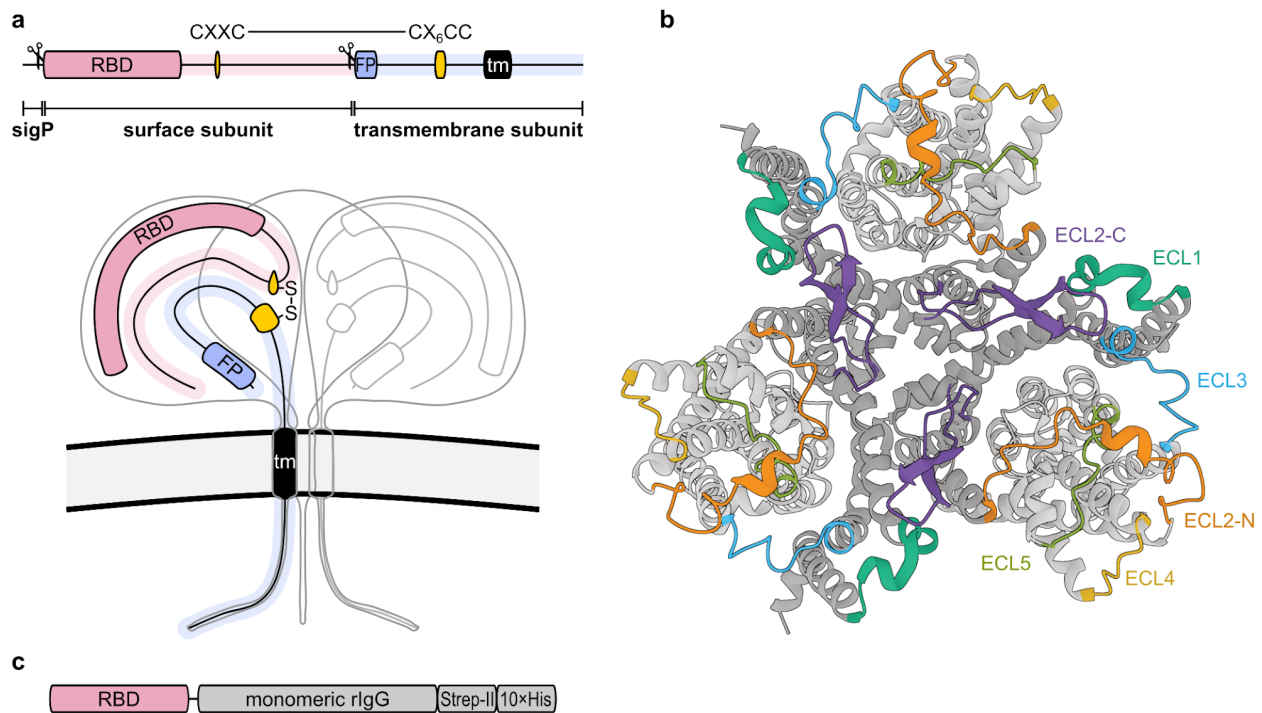

11

12 **Supplementary Figure 1 – Structural architecture of Syncytin-1 and ASCT2.** **a**, Organization of full-length  
 13 Syncytin-1. The surface (SU) subunit is highlighted in pink and transmembrane (TM) subunit is shown in blue.  
 14 Receptor-binding domain corresponds to residues 23 to 152 of the SU subunit and is highlighted in pink. The  
 15 disulfide bond connecting the SU and TM subunits is colored as yellow, while the fusion peptide (FP) is in  
 16 blue. Membrane boundaries are indicated by black lines with shadowed gray region. **b**, Cryo-EM structure of  
 17 ASCT2 in the outward facing state (PDB 6MP6) showing the arrangement of the extracellular loops (ECL).  
 18 The scaffold and transport domains are colored in dark and light gray, respectively. The extracellular loops  
 19 are colored as follows: ECL1 in teal, C-terminus of ECL2 (ECL2-C) in purple, N-terminus of ECL2 (ECL2-N) in  
 20 orange, ECL3 in blue, ECL4 in yellow, and ECL5 in olive green. **c**, Schematic representation of the S1-RBD  
 21 construct used for complex formation. Syncytin-1 RBD is fused to the heavy chain of a monomeric rabbit  
 22 IgG, followed by Strep-II and 10xHis tags.

23

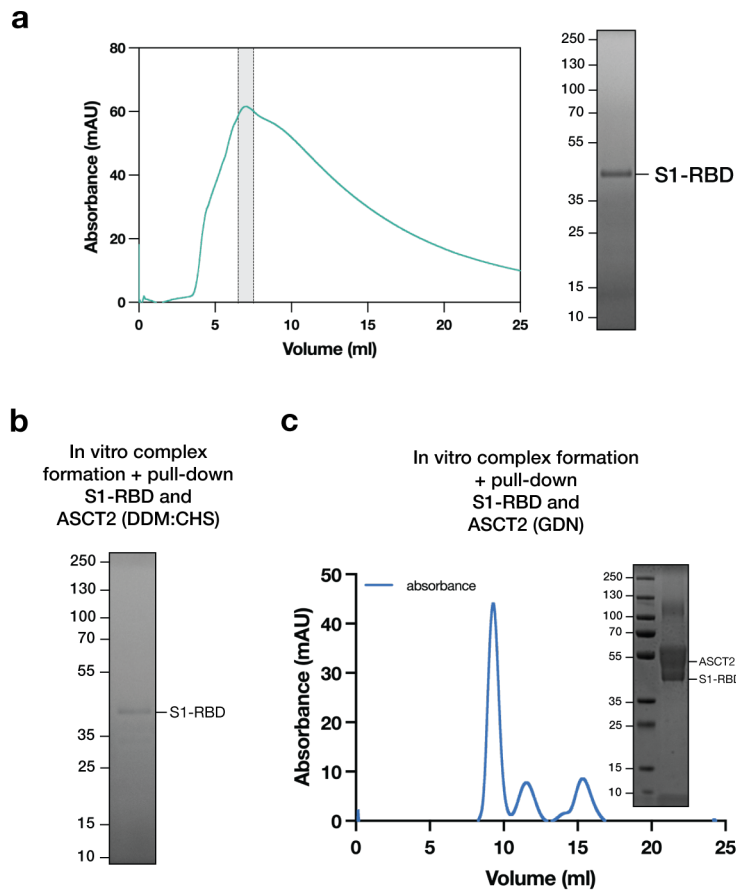

24

25

26

27

28

29

30

31

32

33

**Supplementary Figure 2 – S1-RBD purification and ASCT2–S1-RBD complex formation.** **a**, Elution profile of S1-RBD from the Strep-TactinXT affinity resin. The solid line represents the absorbance at 280 nm. The peak fraction is highlighted as gray area. SDS-PAGE gel analysis of the peak elution fraction highlighted in gray on the chromatogram. **b**, SDS-PAGE gel analysis showing lack of ASCT2-S1 complex formation via pull-down by S1-RBD with ASCT2 in DDM:CHS detergent, with only the purified S1-RBD found back after pull-down. **c**, Chromatogram of a SEC run of the ASCT2-S1-RBD complex formed by pulling down ASCT2 purified in GDN via S1-RBD. The inset shows SDS-PAGE gel analysis of the peak fraction. The solid line represents the absorbance at 280 nm.

33

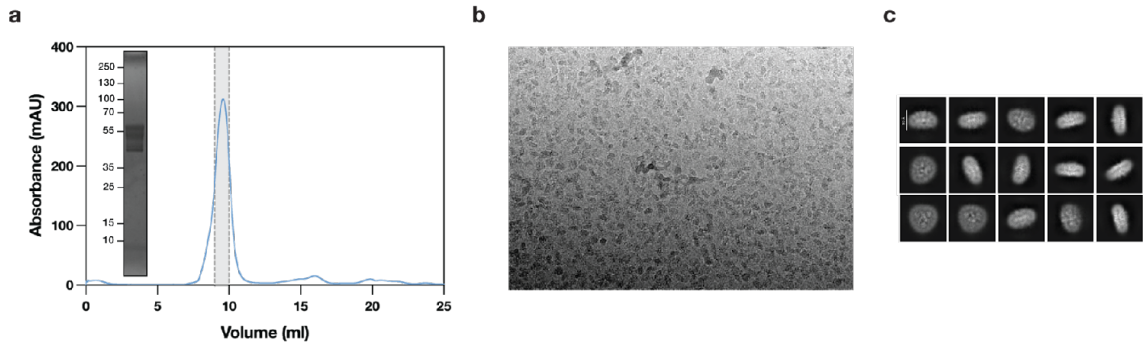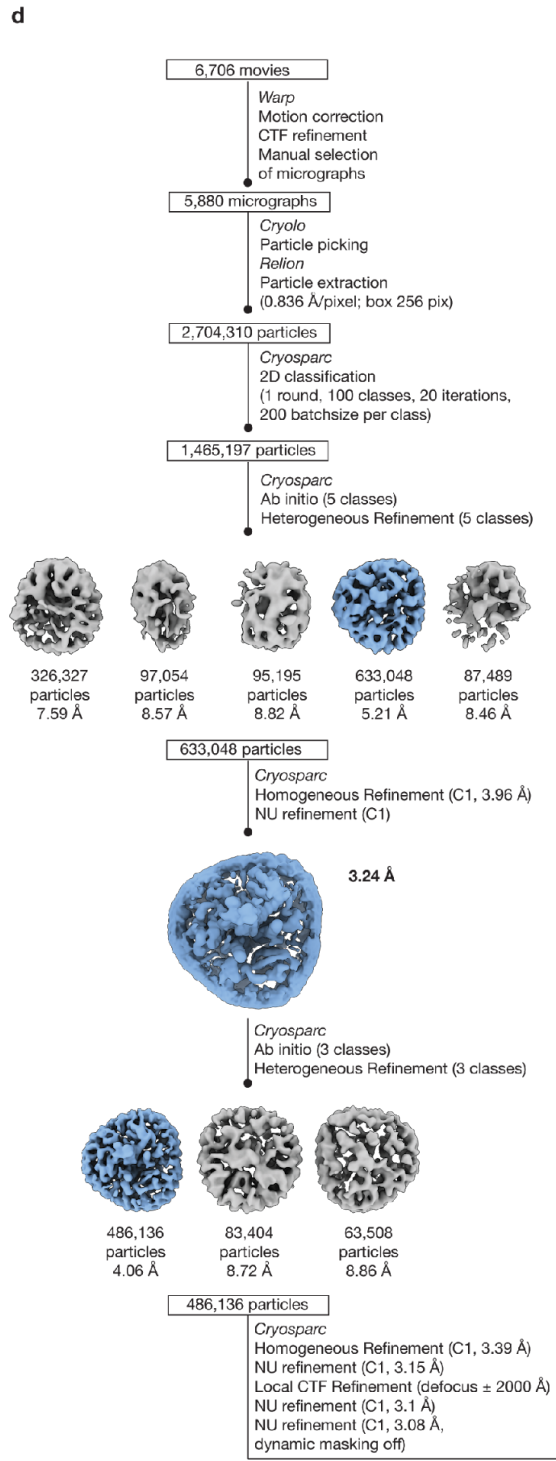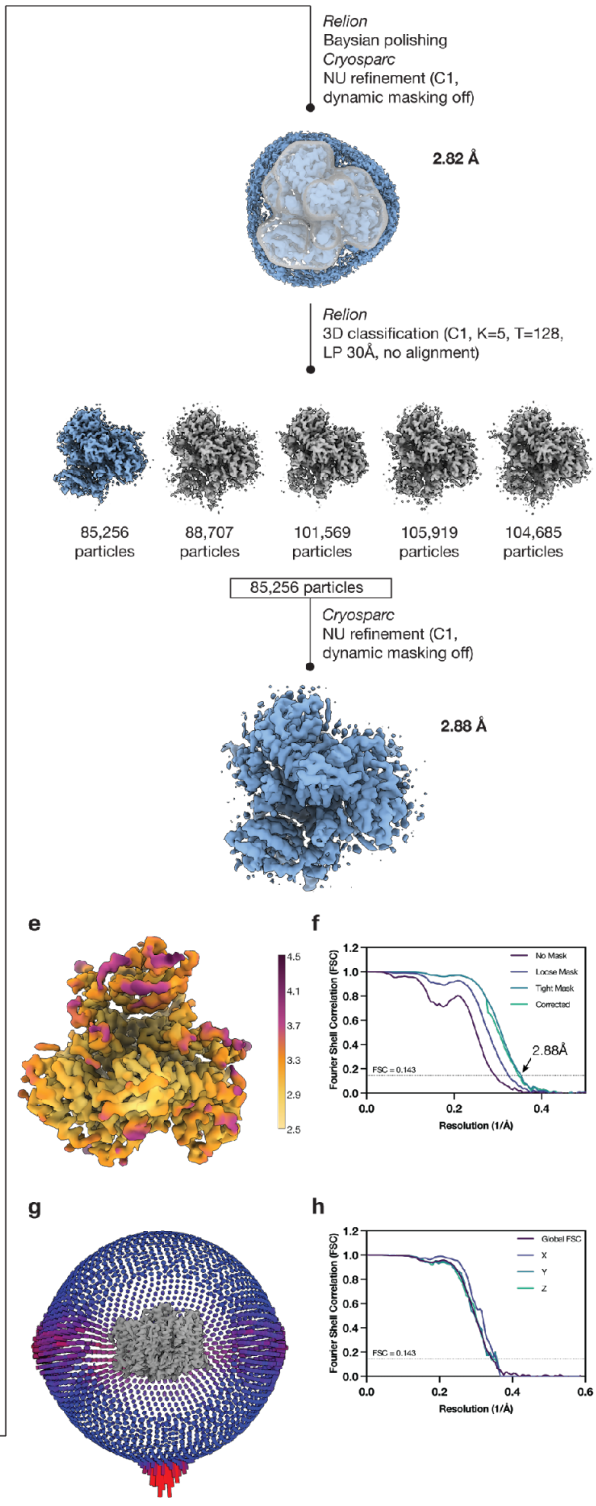

35 **Supplementary Fig. 3 – Cryo-EM analysis of ASCT2 in complex with S1-RBD.** **a**, SEC profile of ASCT2-  
36 S1-RBD complex with SDS-PAGE gel shown as inset. **b**, Representative cryo-EM image showing the ASCT2-  
37 S1-RBD particle distribution. **c**, Representative 2D class averages. **d**, Image processing workflow with final  
38 cryo-EM reconstructions (in blue) and mask used for postprocessing and 3D classification (transparent gray).  
39 Abbreviations: K = classes, T = tau. **e-h**, Validation of the ASCT2-S1-RBD. Shown are local resolution (**e**),  
40 Fourier shell correlation plot with indicated global resolution based on the threshold FSC = 0.143 (**f**), angular  
41 distribution (**g**), and anisotropy plot determined using the remote 3DFSC processing server (**h**).

42

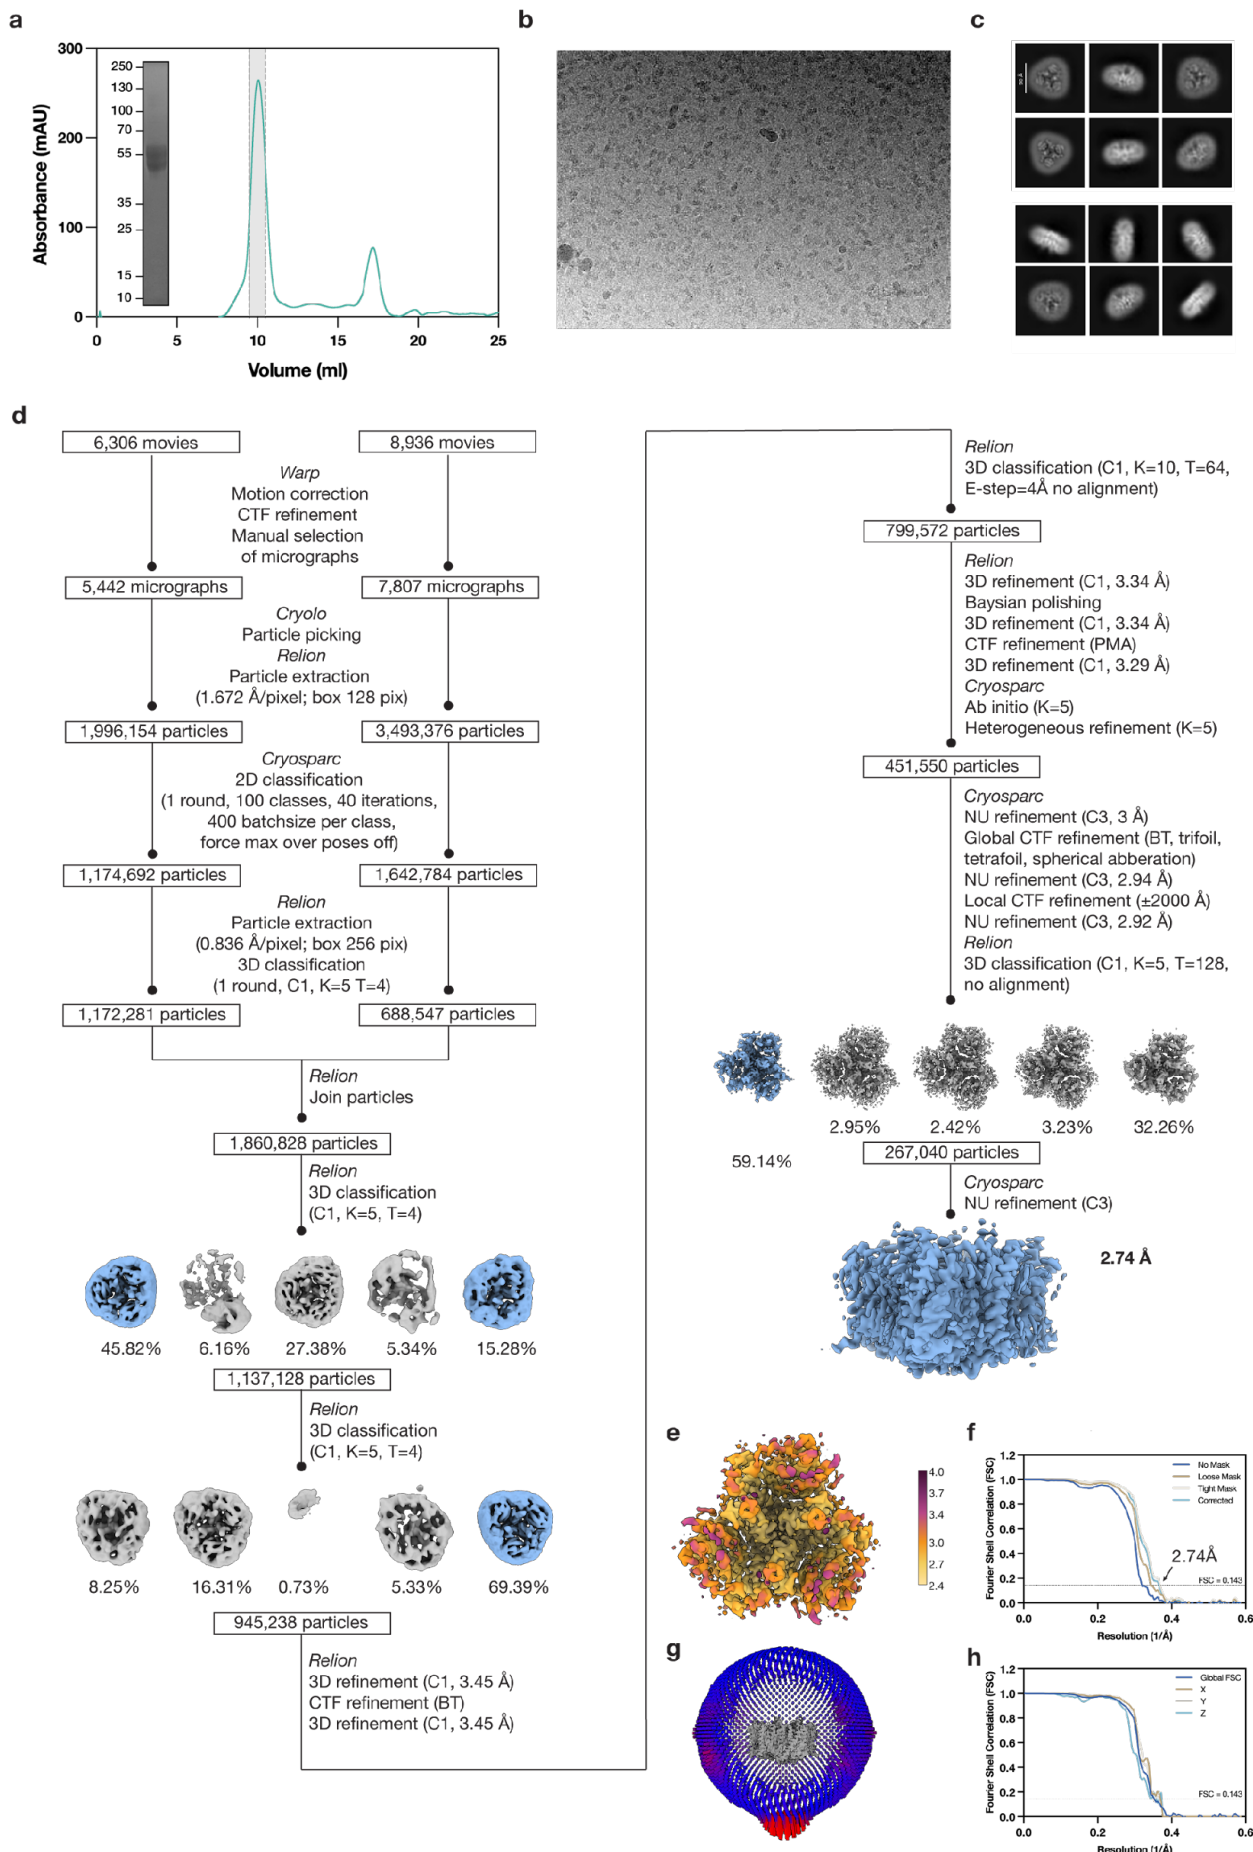

44 **Supplementary Figure 4 – Cryo-EM analysis of ASCT2 in GDN detergent. a**, SEC profile of ASCT2 in GDN  
45 with SDS-PAGE gel shown as inset. **b**, Representative cryo-EM image showing the ASCT2 particle  
46 distribution. **c**, Representative 2D class averages. **d**, Image processing workflow with final cryo-EM  
47 reconstructions (in blue) and mask used for postprocessing and 3D classification (transparent gray).  
48 Abbreviations: K = classes, T = tau. **e-h**, Validation of the ASCT2 cryo-EM map. Shown are local resolution  
49 (**e**), Fourier shell correlation plot with indicated global resolution based on the threshold FSC = 0.143 (**f**),  
50 angular distribution (**g**), and anisotropy plot determined using the remote 3DFSC processing server (**h**).

51

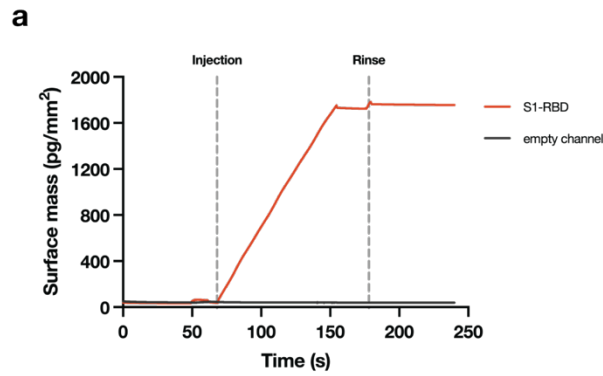

**b** ASCT2 in GDN detergent (channel with immobilized S1-RBD)

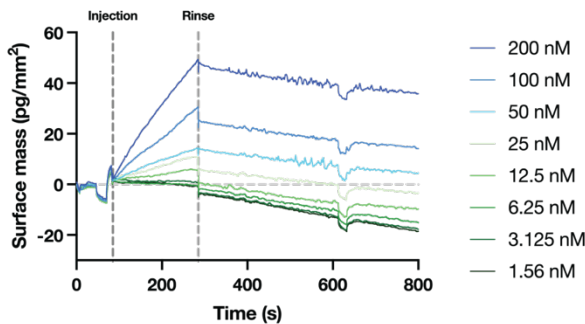

**c** ASCT2 in GDN detergent (empty channel)

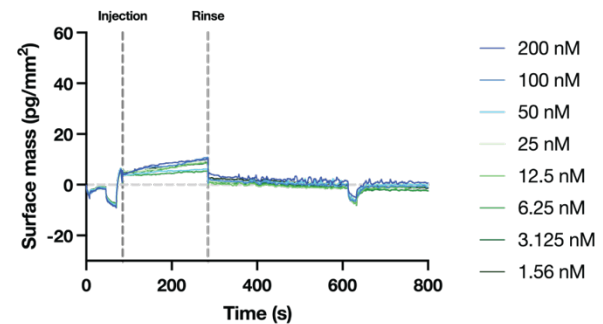

**d** ASCT2 in DDM:CHS detergent (channel with immobilized S1-RBD)

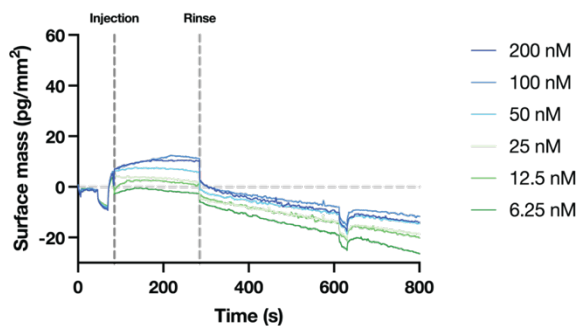

**e** ASCT2 in DDM:CHS detergent (empty channel)

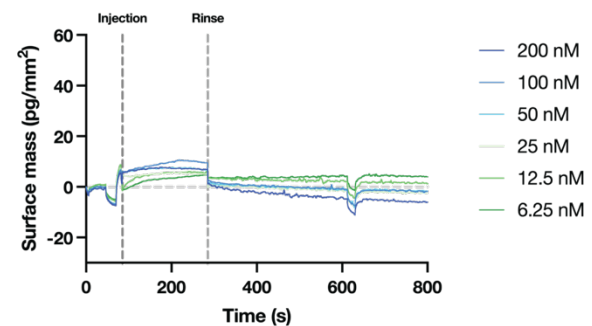

52  
 53 **Supplementary Fig. 5 – GCI analysis of ASCT2 binding to S1-RBD.** **a**, Representative sensogram showing  
 54 S1-RBD immobilization on a Protein G surface (red) with reference channel baseline (gray). Injection and rise  
 55 points indicate the start of sample addition and buffer wash. **b-c**, Raw GCI signals for ASCT2 (GDN) injections  
 56 at different concentrations to S1-RBD surface (**b**) and reference channel (**c**). **e-f**, Raw GCI signals for ASCT2  
 57 (DDM:CHS) injections at different concentrations to S1-RBD surface (**e**) and reference channel (**f**).

58

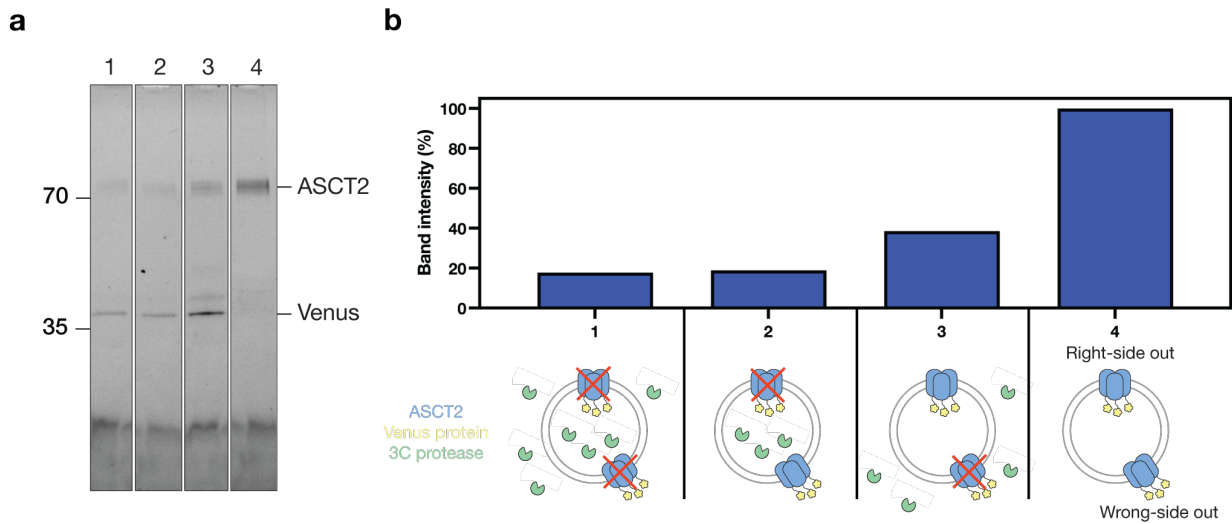

59

60 **Supplementary Fig. 6 – ASCT2 orientation in liposomes.** **a**, SDS-PAGE gel analysis of Venus-tagged  
 61 ASCT2 reconstituted in liposomes, visualized by in-gel fluorescence of the Venus tag, under the following  
 62 conditions: (1) liposomes loaded with the excess of 3C protease incubated with external 3C protease; (2)  
 63 liposomes loaded with the excess of 3C protease incubated without any externally added 3C protease; (3)  
 64 liposomes incubated with the excess of 3C protease; (4) liposomes not treated with 3C protease. **b**,  
 65 Quantification of band intensities from (a) with a schematic of each condition. ASCT2 is shown in blue with  
 66 Venus in yellow, and 3C protease in green. Band intensities were quantified in ImageJ.

67

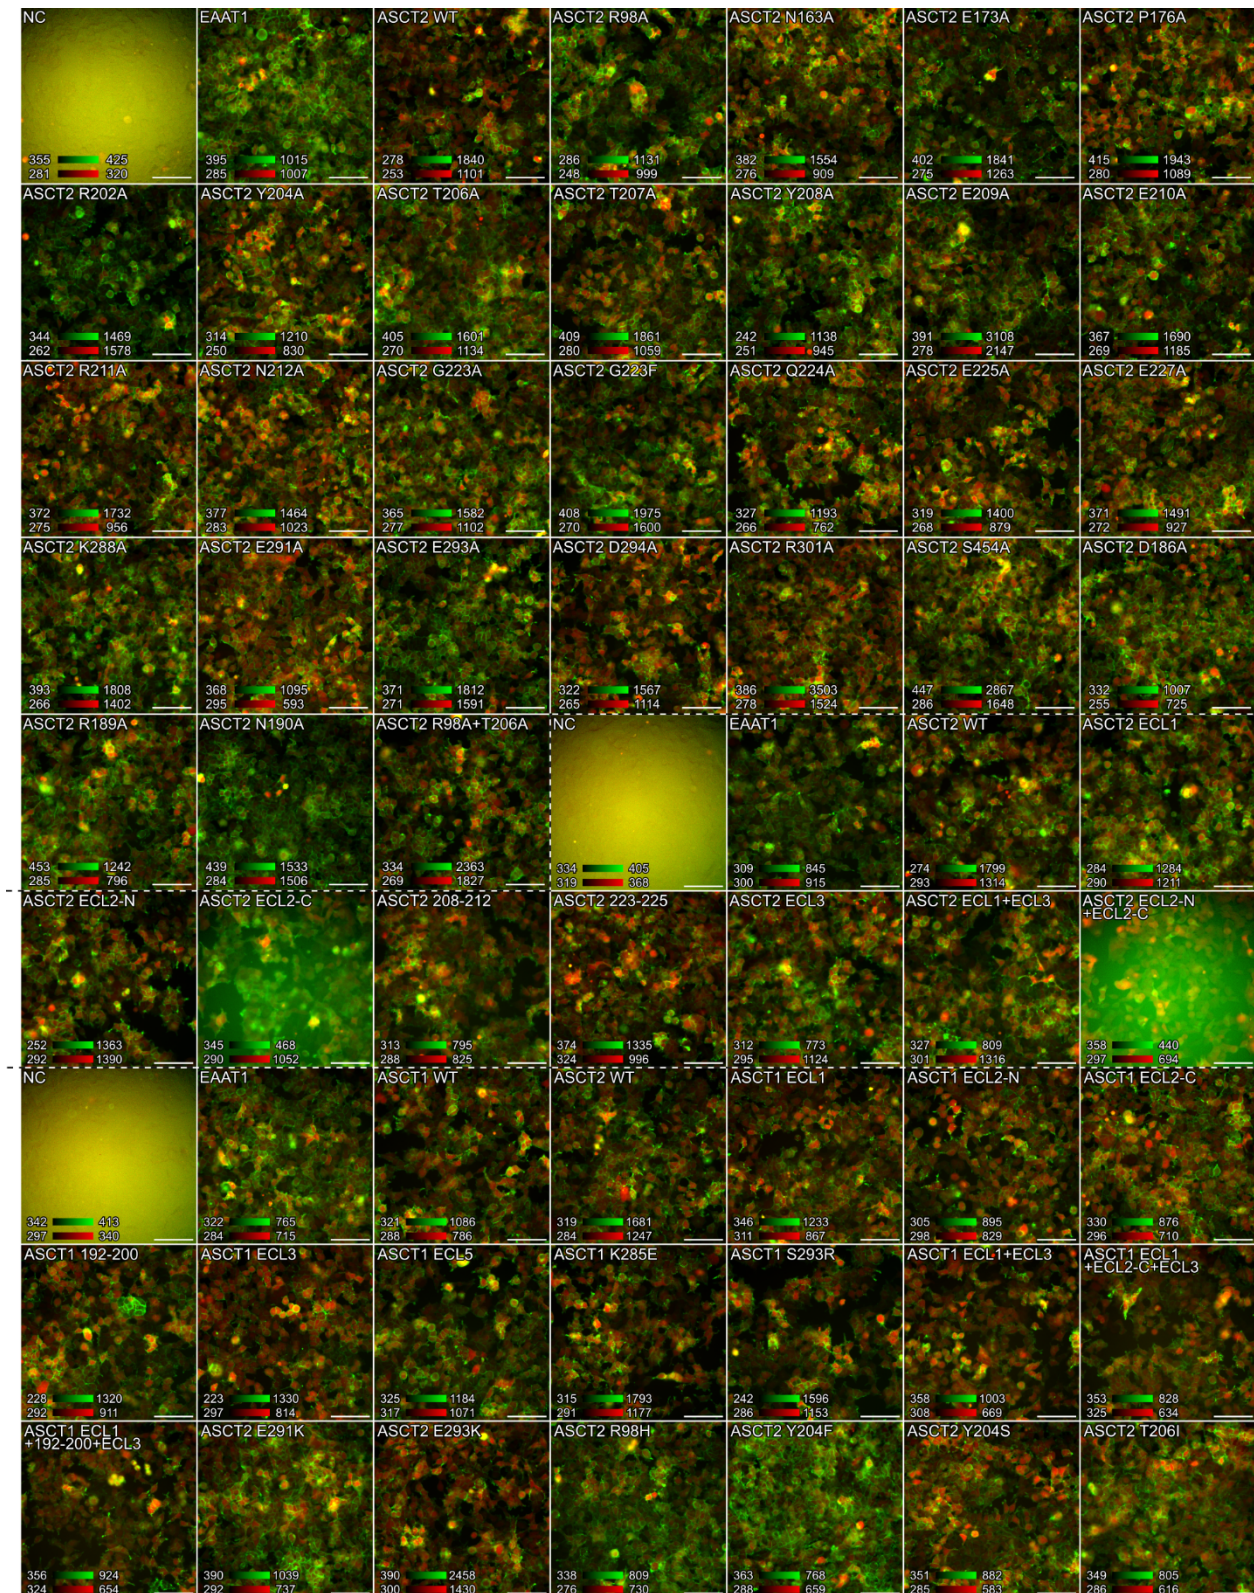

68

69 **Supplementary Fig. 7 – Localization pattern of individual ASCT2 and ASCT1 mutants.** Monochromatic  
70 12-bit fluorescent images in green and infrared channels were captured with Nikon Ti2 microscope equipped  
71 with Nikon DS10 camera and 20× objective. Contrast was adjusted in ImageJ to values shown in the bottom  
72 left corners, images were converted to 8-bit, colorized and merged. Green channel shows localization of  
73 GFP-tagged transporter variants; red channel shows transduced cells expressing IRES-driven iRFP from  
74 transporter mRNA. White scale bars correspond to 100 μm. Dashed lines separate individual experiments.

- 75 NC, ASCT2/ASCT1 double-knockout HEK293T cells; EAAT1, double-knockout cells expressing EAAT1; WT,  
76 double-knockout cells expressing either wild-type ASCT1 or wild-type ASCT2.

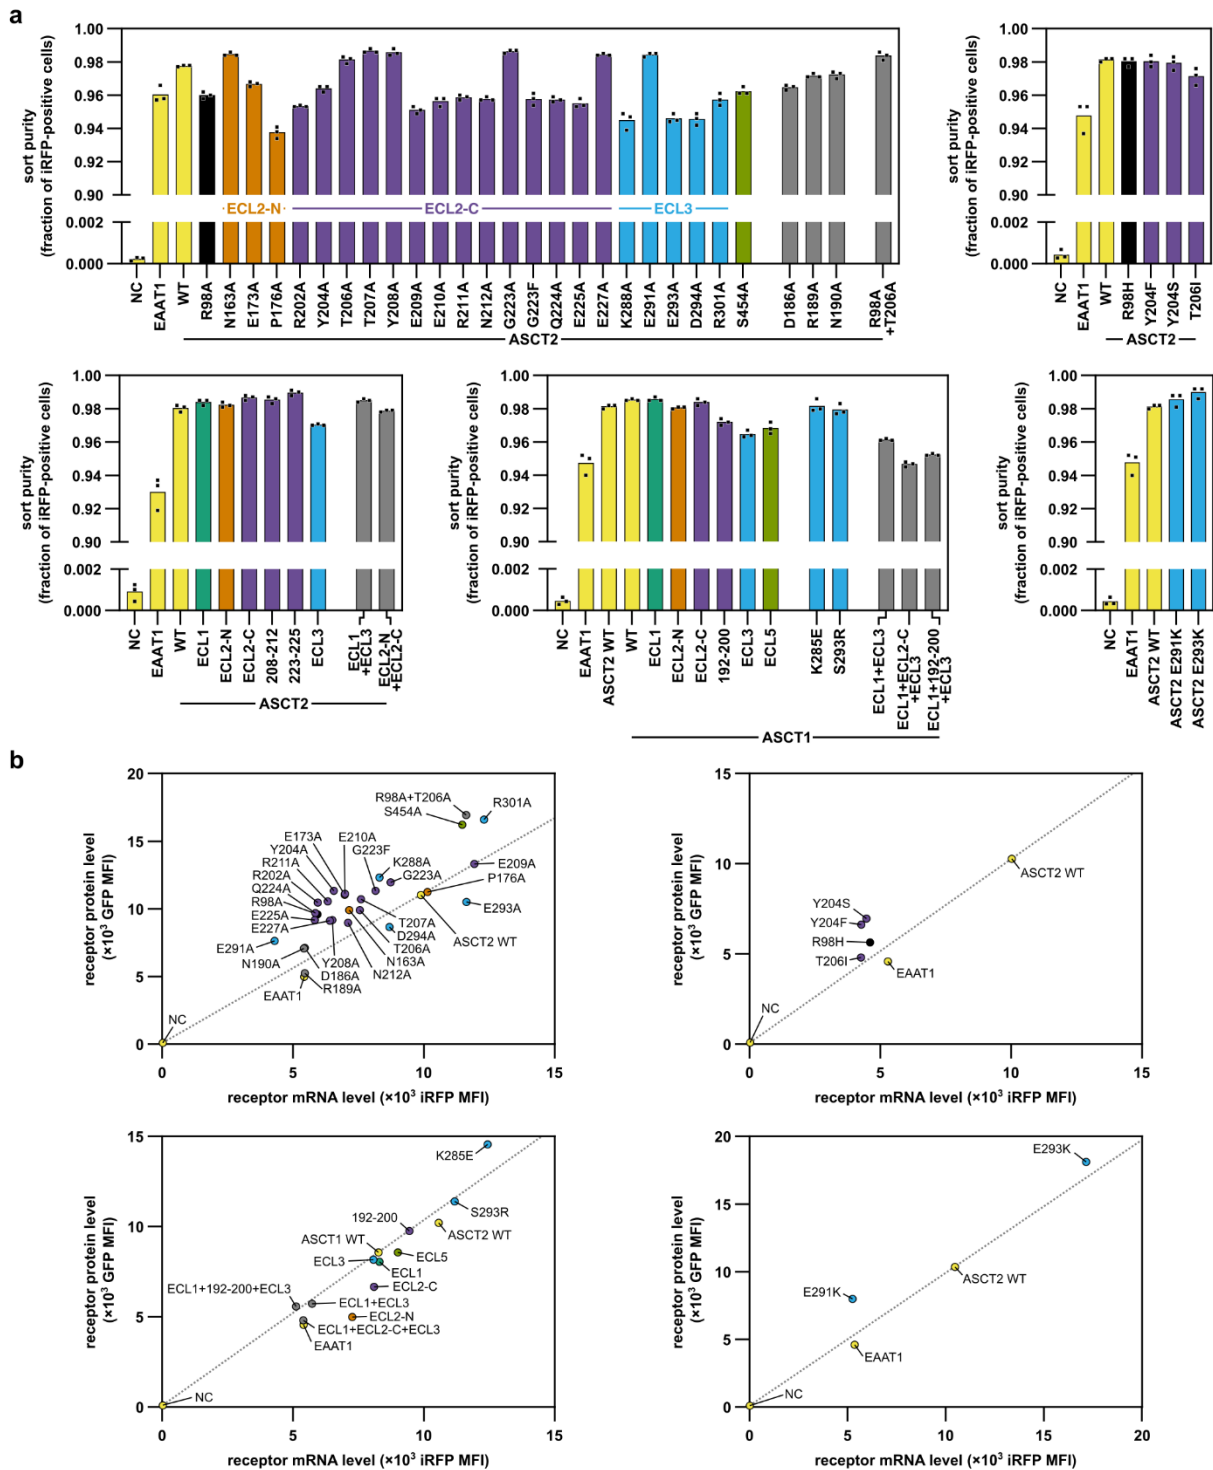

77

78 **Supplementary Fig. 8 – Quality control of transduced transporter variants.** **a**, Population purity of  
 79 transduced cells represented by fraction of iRFP-expressing cells. Individual values of three independent  
 80 measurements are shown with bars representing their means. **b**, Expression efficiency of receptor mutants,  
 81 showing mRNA (x-axis) versus protein levels (y-axis). Average values of three independent measurements  
 82 are shown. Dotted lines connecting NC and ASCT2 WT or ASCT1 WT show expected ratio of protein and  
 83 mRNA levels. NC, ASCT2/ASCT1 double-knockout HEK293T cells; EAAT1, double-knockout cells expressing  
 84 EAAT1; WT, double-knockout cells expressing either wild-type ASCT1 or wild-type ASCT2.

85

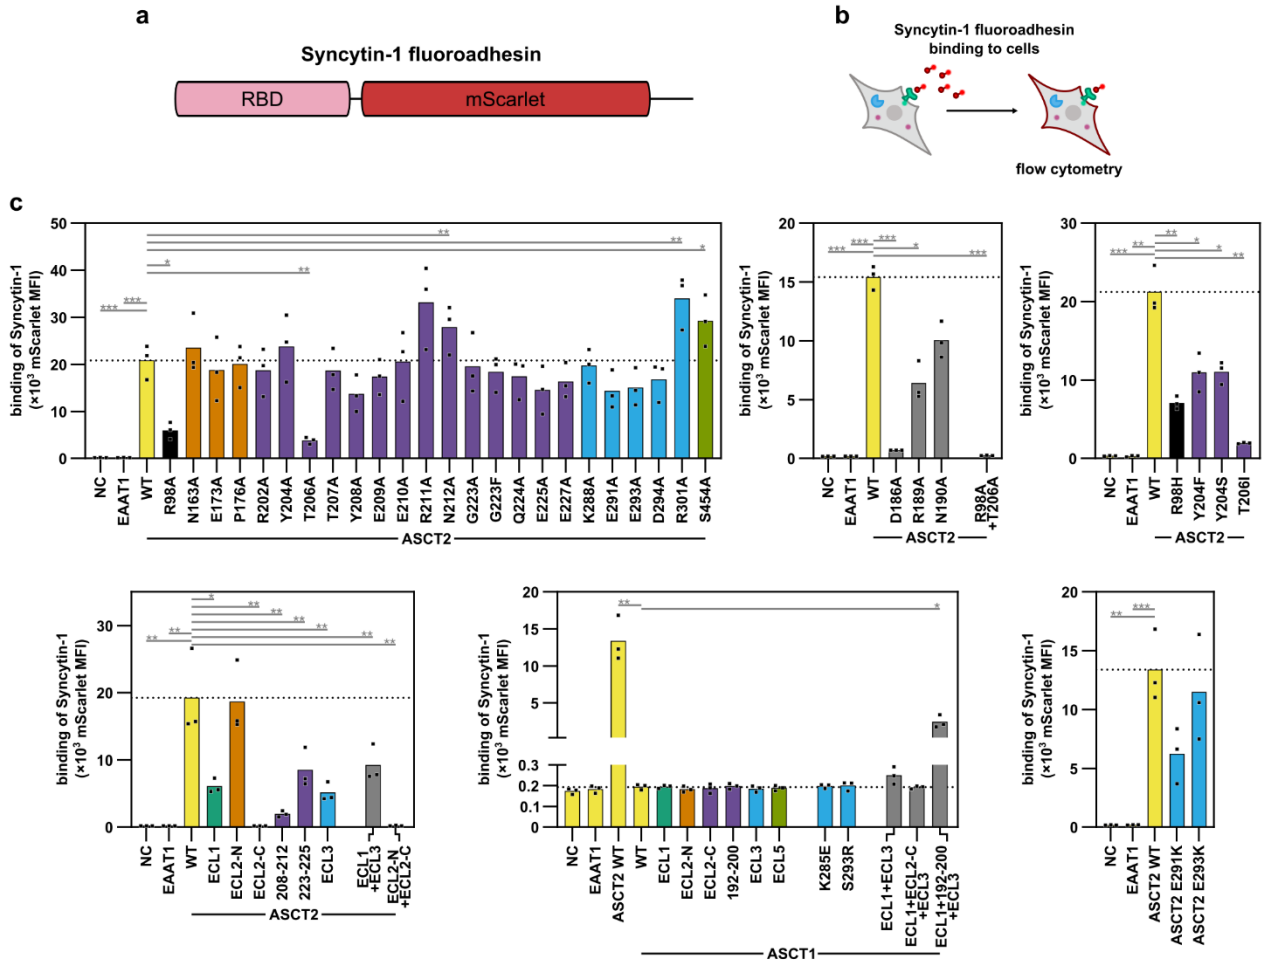

86

87 **Supplementary Fig. 9 – Binding of S1-RBD fluoroadhesin to living cells expressing receptor variants.**

88 **a**, Schematic depiction of S1-RBD fluoroadhesin protein. **b**, Binding assay used for measurements. Cells  
 89 expressing ASCT1 or ASCT2 variants were incubated with S1-RBD fluoroadhesin. Amounts of bound  
 90 fluoroadhesin were detected by flow cytometry. **c**, Bound fluoroadhesin labeled cells with mScarlet and  
 91 individual values of median fluorescent intensity (MFI) in three independent experiments are shown together  
 92 with bars representing their means. Repeated-measures one-way ANOVA with Dunnett's post hoc test versus  
 93 ASCT2 WT or ASCT1 WT was performed on log-transformed data and P-values are shown as follows: \*,  
 94 P<0.05; \*\*, P<0.01; \*\*\*, P<0.001. P-values higher than 0.05 are not shown. NC, ASCT2/ASCT1 double-  
 95 knockout HEK293T cells; EAAT1, double-knockout cells expressing EAAT1; WT, double-knockout cells  
 96 expressing either wild-type ASCT1 or wild-type ASCT2.

97

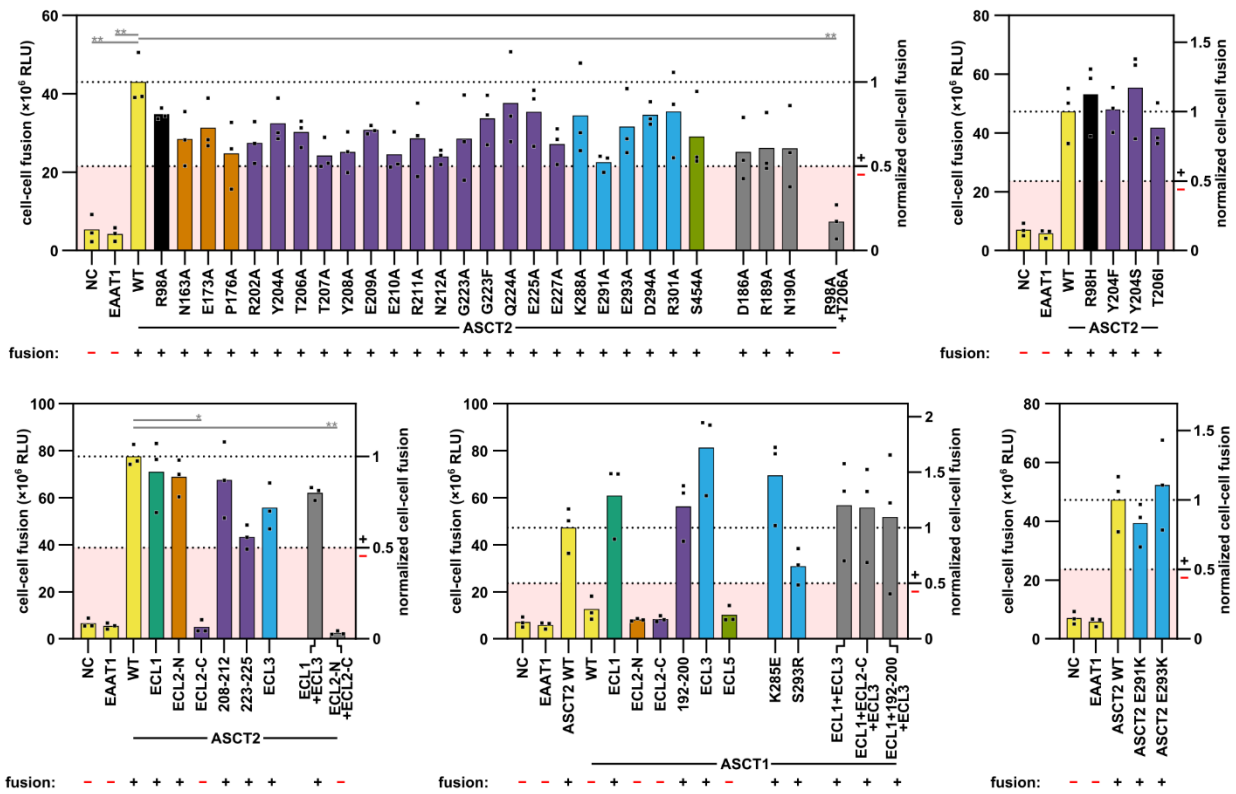

98

99 **Supplementary Fig. 10 – Cell-cell fusion assay based on luciferase complementation.** Relative luciferase  
 100 units (RLU) from three independent experiments are shown, with bars indicating their means. Because the  
 101 fusion event is inherently non-linear, the data were evaluated binarily. An arbitrary threshold was set at 50%  
 102 of the signal observed in ASCT2 WT cells (bottom dotted line). Mutants with values above the threshold were  
 103 classified as fusing (+), whereas those below the threshold were classified as non-fusing (-). As the data were  
 104 not normally distributed, statistical significance was assessed using the Friedman test followed by Dunn's  
 105 multiple comparisons test versus ASCT2 WT or ASCT1 WT. P-values are indicated as follows: \*, P < 0.05; \*\*, P  
 106 P < 0.01. P-values > 0.05 are not shown. NC, ASCT2/ASCT1 double-knockout HEK293T cells; EAAT1,  
 107 double-knockout cells expressing EAAT1; WT, double-knockout cells expressing either wild-type ASCT1 or  
 108 wild-type ASCT2.

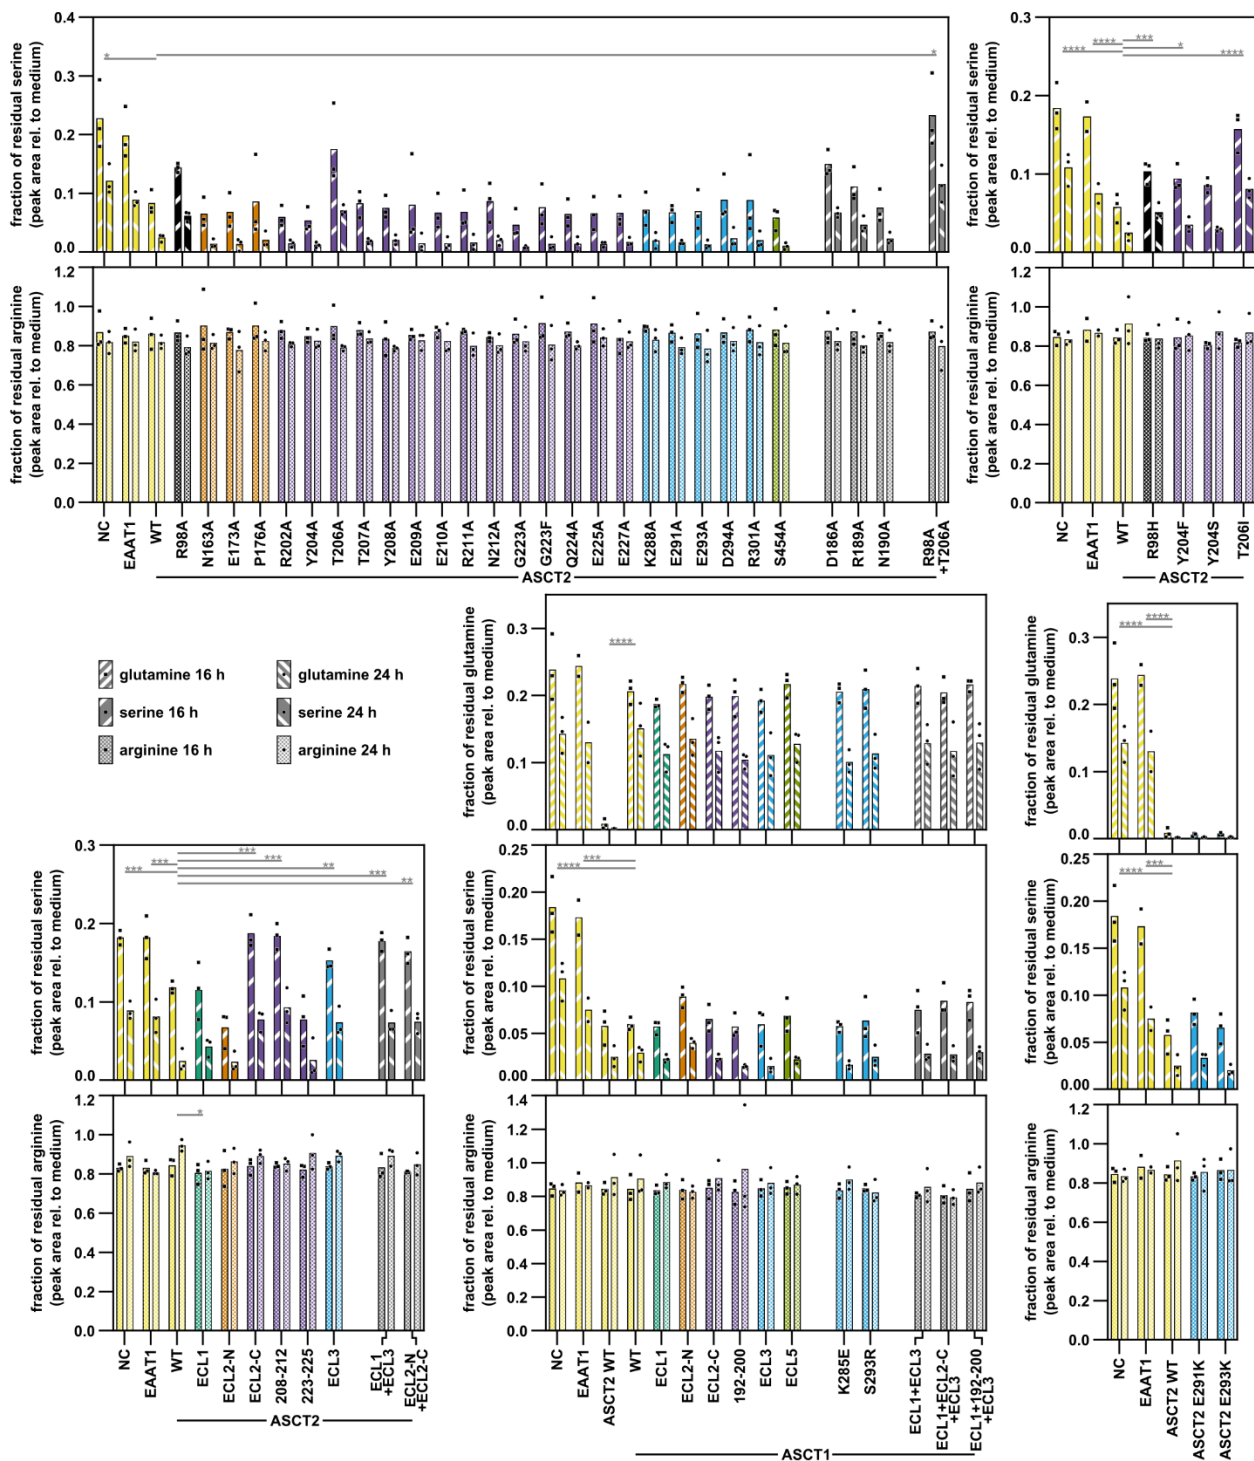

109

110 **Supplementary Fig. 11 – Glutamine, serine, and arginine uptake by cells expressing individual receptor**  
 111 **mutants.** The uptake of deuterated amino acids is shown as fraction of their residual amount in the culture  
 112 medium after 16 h or 24 h cultivation. Arginine was used as an internal standard as it is not transported by  
 113 any of tested transporters. Values of three independent experiments are shown together with bars  
 114 representing their means. Repeated-measures two-way ANOVA with Dunnett's post hoc test versus ASCT2  
 115 WT or ASCT1 WT was performed on log-transformed data and P-values are shown as follows: \*, P<0.05; \*\*,  
 116 P<0.01; \*\*\*, P<0.001; \*\*\*\*, P<0.0001. P-values higher than 0.05 are not shown. NC, ASCT2/ASCT1 double-  
 117 knockout HEK293T cells; EAAT1, double-knockout cells expressing EAAT1; WT, double-knockout cells  
 118 expressing either wild-type ASCT1 or wild-type ASCT2.

```

      10      20      30      40      50      ECL1
ASCT1  M--EKSNETNGYLDSAQAGPAAGPG-----APGTAAG----RARRCAGFLRRQALVLLTVSGVLAGAGLG----AALRGLS
ASCT2  MVADPPRDSKGL---AAAEPTANGGLALASIEDQGAAGGYCGSRDQVRRCLRANLLVLLTVVAVVAGVALGLGVSGAGGALA
      10      20      30      40      50      60      70      80

      70      80      90      100     110     120     130     ECL2-N
ASCT1  LSRTQVTYLAFPGEMLLRMLRMIIILPLVVCSLVSGAASLDASCLGRLGGIAVAYFGLTTLSASALAVAFIIKPGSGAQTLQ
ASCT2  LGPERLSAFVFPGELLRLRLRMIIILPLVVCSLIGGAASLDPGALGRLGAWALLFFLVTTLLASALGVGLALALQPGAASAAIN
      90      100     110     120     130     140     150     160

      150     160     170     180     190     ECL2-C     220     230
ASCT1  SSDLGLEDSGPPPVPKETVDSFLDLARNLFPSNLVVAFRTYATDYKVVTQNSSSGNVTHEKIPIGTEIEGMNILGLVLFALV
ASCT2  AS-VGAAGSAENAPSKEVLDSFLDLARNIFPSNLVSAAFRSYTTYE---ERNITG--TRVKVPVQGEVEGMNILGLVVFAIV
      170     180     190     200     210     220     230     240

      240     250     260     270     ECL3     300     310
ASCT1  LGVALKLGSEGEDLIRFFNSNLNEATMVLVSWIMWYVPVGIMFLVGSKIVEMKDIIVLVTSLGKYIFASILGHVIHGGIVLPL
ASCT2  FGVALRLKGPEGELLIRFFNSFNEATMVLVSWIMWYAPVGIMFLVGKIVEMEDVGLLFARLGKYILCCLLGHAIHGLLVLPL
      250     260     270     280     290     300     310     320

      320     330     340     350     360     370     380     390
ASCT1  IYFVFTRKNPFRLLGLLAPFATAFATCSSSATLPSMMKCIEENGVDKRISRFILPIGATVNMDGAAIFQCVAAVFIAQLNN
ASCT2  IYFLFTRKNPYRFLWGIVTPLATAFGTSSSATLPLMMKCVEENGVAKHISRFILPIGATVNMDGAALFQCVAAVFIAQLSQ
      330     340     350     360     370     380     390     400

      ECL4     410     420     430     ECL5     460     470     480
ASCT1  VELNAGQIFTILVTTATASSVGAAGVPPAGGVLTIAIILEAIGLPTHDLPLILAVDWIVDRTTTVVNVEGDALGAGILHHLNQKA
ASCT2  QSLDFVKIITILVTTATASSVGAAGIPPAGGVLTLAIILEAVNLPVDHISLILAVDWLVDRSCTVLNVEGDALGAGLLQNYVDRT
      410     420     430     440     450     460     470     480

      490     500     510     520     530
ASCT1  -TKKGEQELAEVKVE--AIPNCKSEEETSPLVTHQNPAGPVASAPELESKESVL*
ASCT2  ESRSTEPELIQVKSELPLDPLPVPTEEGNPLKHYR--GPAGDATVASEKESVM*
      490     500     510     520     530     540

```

119

120 **Supplementary Fig. 12 – Sequence alignment of ASCT1 and ASCT2.** The alignment was generated using

121 MAFFT and ECL regions are highlighted.

122

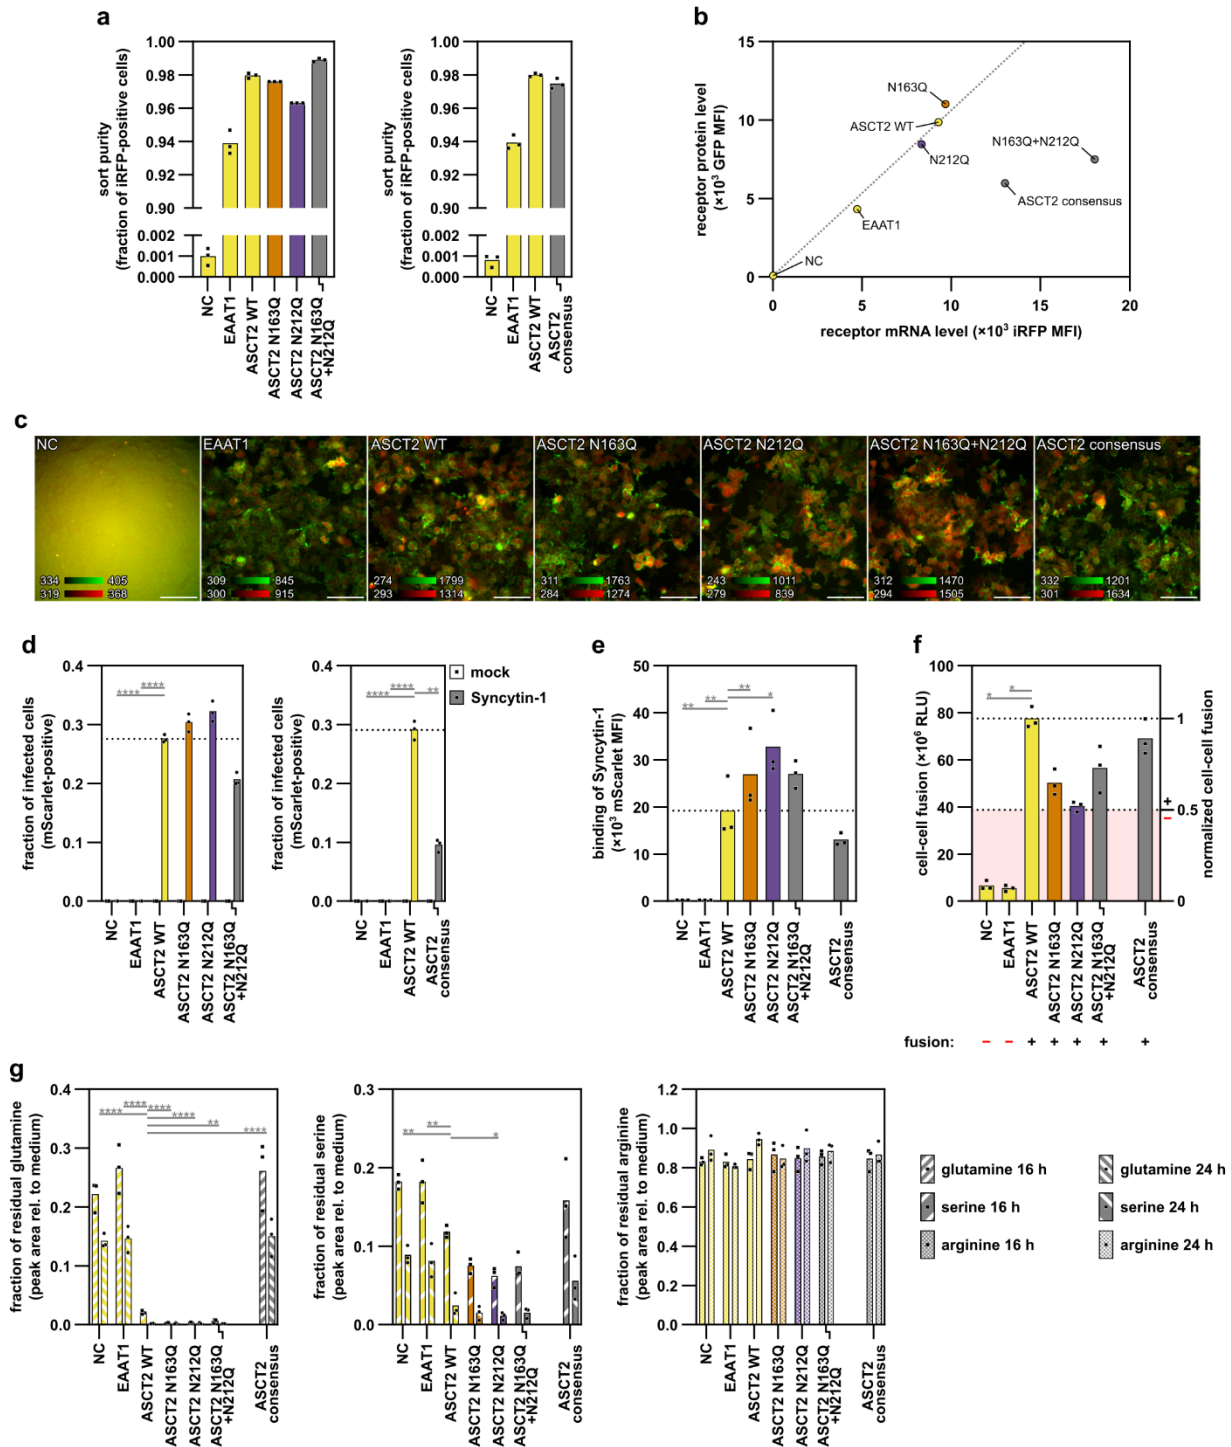

123

124 **Supplementary Fig. 13 – Cells expressing deglycosylated and consensus variants of ASCT2 and their**  
 125 **interaction with Syncytin-1.** **a**, Population purity of transduced cells represented by fraction of iRFP-  
 126 expressing cells. **b**, Expression analysis of ASCT2 extracellular loop mutants, comparing mRNA levels  
 127 (median fluorescence intensity of iRFP, x-axis) and protein expression (median fluorescence intensity of GFP,  
 128 y-axis). Average values of three independent measurements are shown. Dotted line connecting NC and  
 129 ASCT2 WT shows expected ratio of protein and mRNA levels. **c**, Localization pattern of ASCT2 mutants.  
 130 Monochromatic 12-bit fluorescent images in green and infrared channels were captured with Nikon Ti2  
 131 microscope equipped with Nikon DS10 camera and 20x objective. Contrast was adjusted in ImageJ to values  
 132 shown in the bottom left corners, images were converted to 8-bit, colored and merged. Green channel  
 133 shows localization of GFP-tagged transporter variants; red channel shows transduced cells expressing IRES-

134 driven iRFP from transporter mRNA. White scale bars correspond to 100  $\mu\text{m}$ . **d**, Infection efficiency of cells  
135 expressing individual ASCT2 mutants by Syncytin-1-pseudotyped virus. Repeated-measures two-way  
136 ANOVA with Dunnett's post hoc test versus ASCT2 WT was performed on data transformed with  
137 complementary log-log regression. **e**, Binding of S1-RBD fluoroadhesin to living cells expressing ASCT2  
138 mutants. Bound fluoroadhesin labeled cells with mScarlet and individual values of median fluorescent  
139 intensity (MFI) are shown. Repeated-measures one-way ANOVA with Dunnett's post hoc test versus ASCT2  
140 WT was performed on log-transformed data. **f**, Cell-cell fusion assay based on luciferase complementation.  
141 Relative luciferase units (RLU) from three independent experiments are shown. Mutants with values above  
142 50% of ASCT2 WT were classified as fusing (+), whereas those below the threshold were classified as non-  
143 fusing (-). Friedman test followed by Dunn's multiple comparisons test versus ASCT2 WT was performed. **g**,  
144 Glutamine, serine, and arginine uptake by cells expressing individual receptor mutants. The uptake of  
145 deuterated amino acids is shown as fraction of their residual amount in the culture medium after 16 h or 24  
146 h cultivation. Repeated-measures two-way ANOVA with Dunnett's post hoc test versus ASCT2 WT was  
147 performed on log-transformed data. P-values are shown as follows: \*,  $P < 0.05$ ; \*\*,  $P < 0.01$ ; \*\*\*,  $P < 0.001$ ; \*\*\*\*,  
148  $P < 0.0001$ . P-values higher than 0.05 are not shown. NC, ASCT2/ASCT1 double-knockout HEK293T cells;  
149 EAAT1, double-knockout cells expressing EAAT1; WT, double-knockout cells expressing wild-type ASCT2.

150

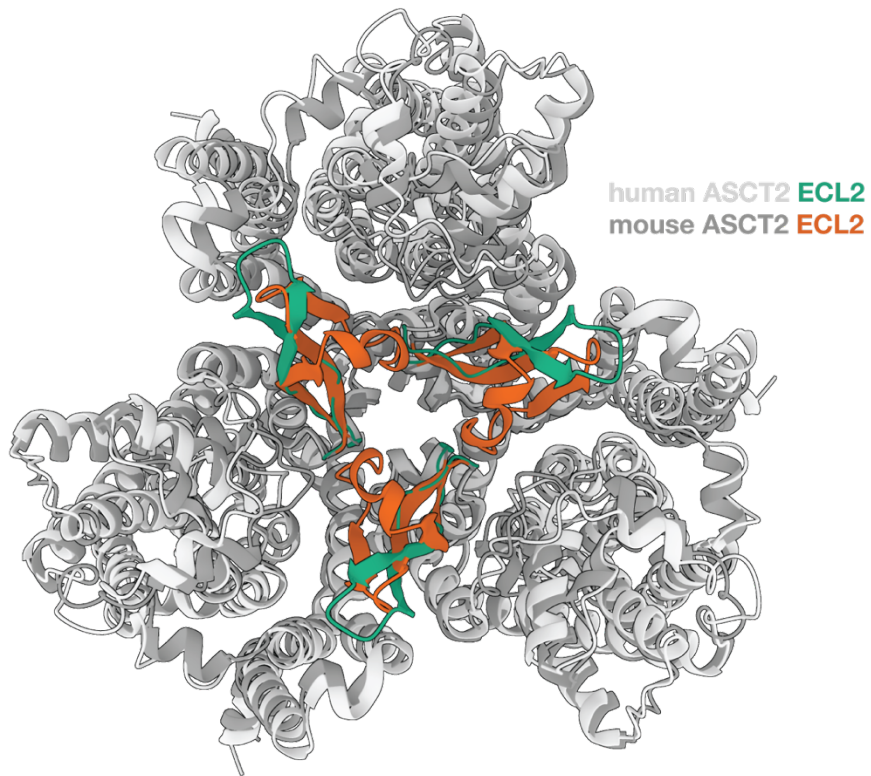

151

152 **Supplementary Fig. 14 – Structural comparison of mouse and human ASCT2.** Overlay of the mouse  
153 ASCT2 model predicted by AlphaFold3 (dark gray) and the human ASCT2 cryo-EM structure (light gray, PDB  
154 6MP6), both shown in the outward-facing conformation. Extracellular loop 2 (ECL2) is highlighted to illustrate  
155 differences in length and positioning. ECL2 of human ASCT2 is shown in green, whereas ECL2 of mouse  
156 ASCT2 in orange.

157

**Supplementary Table 1 – Cryo-EM data collection, refinement and validation statistics.**

|                                                           | <b>ASCT2 in GDN<br/>(PDB ID 30LK,<br/>EMD-57883)</b> | <b>ASCT2-S1-RBD complex in<br/>GDN<br/>(PDB ID 30LJ, EMD-57882)</b> |
|-----------------------------------------------------------|------------------------------------------------------|---------------------------------------------------------------------|
| <b>Data collection and processing</b>                     |                                                      |                                                                     |
| Microscope                                                | Thermo Fisher Titan Krios                            |                                                                     |
| Detector                                                  | Gatan K3 Bioquantum                                  |                                                                     |
| Camera mode                                               | Superresolution counting mode, binned by 2           |                                                                     |
| Voltage (kV)                                              | 300                                                  |                                                                     |
| Nominal magnification                                     | 105,000                                              |                                                                     |
| Pixel size (Å)                                            | 0.836                                                |                                                                     |
| Number of frames                                          | 76                                                   |                                                                     |
| Total electron exposure (e <sup>-</sup> /Å <sup>2</sup> ) | 59.9                                                 | 60                                                                  |
| Defocus range (µm)                                        | -0.9 to -1.9                                         |                                                                     |
| Micrographs collected                                     | 15,242                                               | 6,706                                                               |
| Micrographs used                                          | 13,249                                               | 5,880                                                               |
| Total number of extracted particles                       | 5,489,530                                            | 2,704,310                                                           |
| Final number of particles                                 | 267,040                                              | 1,465,197                                                           |
| Symmetry imposed                                          | C3                                                   | C1                                                                  |
| Global map resolution (Å) (FSC 0.143)                     | 2.74                                                 | 2.88                                                                |
| Map resolution range (Å)                                  | ~2.4 to 4.0                                          | ~2.5 to 4.0                                                         |
| <b>Refinement</b>                                         |                                                      |                                                                     |
| Initial model used (PDB code)                             | 8QRO                                                 | 8QRO and 8OUJ                                                       |
| Model resolution (Å) (FSC 0.5)                            | 2.9                                                  | 3.2                                                                 |
| Map sharpening                                            | -120                                                 |                                                                     |
| Model composition                                         |                                                      |                                                                     |
| Chains                                                    | 3                                                    | 4                                                                   |
| Non-hydrogen atoms                                        | 9450                                                 | 10,749                                                              |
| Protein residues                                          | 1266                                                 | 1441                                                                |
| Ligands                                                   |                                                      |                                                                     |
| Gln                                                       | 3                                                    | 3                                                                   |
| R.m.s deviations                                          |                                                      |                                                                     |
| Bond lengths (Å)                                          | 0.003                                                | 0.004                                                               |
| Bond angles (°)                                           | 0.582                                                | 0.603                                                               |
| Validation                                                |                                                      |                                                                     |
| MolProbity score                                          | 1.26                                                 | 1.37                                                                |
| Clashscore                                                | 4.94                                                 | 6.47                                                                |
| Poor rotamers (%)                                         | 0.90                                                 | 0.79                                                                |
| Ramachandran plot                                         |                                                      |                                                                     |
| Favored (%)                                               | 98.31                                                | 97.97                                                               |
| Allowed (%)                                               | 1.69                                                 | 2.03                                                                |
| Outliers (%)                                              | 0.00                                                 | 0.00                                                                |

160 **Supplementary Table 2 – List of mutations introduced in ASCT2 constructs.**

| <b>Construct name</b> | <b>Mutations</b>                                                     |
|-----------------------|----------------------------------------------------------------------|
| ECL1                  | deletion E84-RL-S87                                                  |
| ECL2-N                | N163A, E173A, P176A                                                  |
| ECL2-C                | Y204A, T206A, Y208A, E209A, E210A, R211A, N212A, G223A, Q224A, E225A |
| 208-212               | Y208A, E209A, E210A, R211A, N212A                                    |
| 223-225               | G223A, Q224A, E225A                                                  |
| ECL3                  | K288A, E293A, D294A, R301A                                           |

161  
162

163  
164

**Supplementary Table 3 – List of engineered ASCT1 variants featuring replaced extracellular loops with equivalent ASCT2 counterparts.**

| Loop    | ASCT1   |                                               | ASCT2   |                                          |
|---------|---------|-----------------------------------------------|---------|------------------------------------------|
|         | Number  | Residues                                      | Number  | Residues                                 |
| ECL1    | 68-74   | S68-RTQVT-Y74                                 | 82-88   | G82-PERLS-A88                            |
| ECL2-N  | 140-163 | K140-<br>PGSGAQLQSSDLGLEDSGP<br>PP-V163       | 154-175 | Q154-<br>PGAASAAINASVGAAGSAEN-<br>A175   |
| ECL2-C  | 190-218 | T190-<br>YATDYKVVTONSSSGNVTHE<br>KIPIGTE-I218 | 203-226 | S203-<br>YSTTYEERNITGTRVKVPVGG<br>E-V226 |
| 192-200 | 192-200 | A192-TDYKVV-TQ200                             | 205-213 | S205-TTYEERN-I213                        |
| ECL3    | 285-293 | K285, V289, T292, S293                        | 293-301 | E293, L297, A300, R301                   |
| ECL5    | 446     | P446                                          | 454     | S454                                     |

165  
166

**Supplementary Table 4 – Comparison of receptor interfaces among enveloped viruses.**

| Family             | Genus           | PDB ID         | Virus                                                              |                                                         | Receptor        |                                  |                                       |
|--------------------|-----------------|----------------|--------------------------------------------------------------------|---------------------------------------------------------|-----------------|----------------------------------|---------------------------------------|
|                    |                 |                | Name                                                               | Envelope glycoprotein                                   | Name            | Interacting residues within 3.5Å | Buried surface area (Å <sup>2</sup> ) |
| Retroviridae       | Gammaretrovirus | this structure | HERV-W                                                             | Syncytin-1                                              | ASCT2           | 37                               | 3148.6                                |
|                    |                 | 8OUJ           | HERV-W                                                             | Syncytin-1                                              | ASCT2           | 31                               | 3150.7                                |
|                    |                 | 8OUI           | HERV-H                                                             | Suppressyn                                              | ASCT2           | 28                               | 2417                                  |
|                    |                 | 7OIX           | HERV-FRD                                                           | Syncytin-2                                              | MFSD2A          | 13                               | 1237.4                                |
|                    |                 | 9FQT           | Friend leukemia virus (FrMLV)                                      | Env                                                     | CAT1 (SLC7A1)   | 19                               | 798.15                                |
|                    | Lentivirus      | 1GC1           | Human immunodeficiency virus (HIV-1)                               | Env                                                     | CD4             | 17                               | 1366.5                                |
|                    |                 | 3JCB           | HIV-1                                                              | Env                                                     | CD4             | 15                               | 1008.1                                |
|                    |                 | 6MEO           | HIV-1                                                              | Env                                                     | CD4             | 14                               | 1276.6                                |
| CCR5               | 24              |                |                                                                    |                                                         | 2034.1          |                                  |                                       |
| Coronaviridae      | Betacoronavirus | 6M0J           | Severe acute respiratory syndrome-related coronavirus (SARS-CoV-2) | Spike protein (S1)                                      | ACE2            | 15                               | 850.97                                |
| Filoviridae        | Orthoebolavirus | 5F1B           | Zaire ebolavirus                                                   | Envelope glycoprotein (GP)                              | NPC1            | 11                               | 808.15                                |
|                    |                 | 9DZ2           | Sudan ebolavirus                                                   | Envelope glycoprotein (GP)                              | NPC1            | 11                               | 707.09                                |
| Paramyxoviridae    | Henipavirus     | 2VSM           | Nipah virus                                                        | Nipah glycoprotein (G)                                  | Ephrin-B2       | 23                               | 2329                                  |
|                    | Morbillivirus   | 3ALZ           | Measles virus                                                      | Hemagglutinin glycoprotein (H)                          | SLAM            | 11                               | 1002.3                                |
|                    |                 | 3INB           | Measles virus                                                      | Hemagglutinin glycoprotein (H)                          | CD46            | 23                               | 1092.2                                |
|                    |                 | 4GJT           | Measles virus                                                      | Hemagglutinin glycoprotein (H)                          | HveC (Nectin-1) | 15                               | 1016.5                                |
| Arenaviridae       | Mammarenavirus  | 3KAS           | Machupo virus                                                      | Glycoprotein G1                                         | TfR1            | 14                               | 1087.2                                |
| Orthoherpesviridae | Simplexvirus    | 1JMA           | Herpes simplex virus (HSV1)                                        | Envelope glycoprotein D (gD)                            | HveA (TNR14)    | 14                               | 822.44                                |
|                    |                 | 3SKU           | HSV1                                                               | Envelope glycoprotein D (gD)                            | HveC (Nectin-1) | 17                               | 907.87                                |
|                    | Cytomegalovirus | 7M22           | Human cytomegalovirus                                              | Envelope glycoproteins gH, gL, UL128, UL130, and UL131A | Neuropilin-2    | 4                                | 710.86                                |
|                    | Rhadinovirus    | 7CZF           | Kaposi Sarcoma associated herpesvirus (KSHV)                       | Envelope glycoproteins gH and gL                        | Ephrin-A2       | 13                               | 1132.2                                |

169 **Supplementary Table 5 – MRM parameters for mass spectrometry analysis.**

| <b>Compound ID</b>         | <b>Q1 mass (Da)</b> | <b>Q3 mass (Da)</b> | <b>Dwell time (ms)</b> | <b>DP (V)</b> | <b>EP (V)</b> | <b>CE (V)</b> | <b>CXP (V)</b> |
|----------------------------|---------------------|---------------------|------------------------|---------------|---------------|---------------|----------------|
| L-Serine-d <sub>3</sub>    | 109.1               | 63.1                | 28                     | 35            | 10            | 16            | 8              |
| L-Glutamine-d <sub>5</sub> | 152.1               | 88.0                | 28                     | 50            | 10            | 25            | 8              |
| L-Arginine-d <sub>7</sub>  | 182.2               | 60.1                | 28                     | 35            | 10            | 21            | 8              |

170

171
